# Supplementary material for: Dehydrocyclization–cracking of methyl oleate by Pt catalysts supported on a ZnZSM-5–Al2O3 hierarchical composite
Source: Royal Society of Chemistry journal article supplement (doi:10.1039/d1ra02677a), 2021-01-01
Supplement: d1ra02677a1.pdf [file d1ra02677a1.pdf]

**Table S1** Surface area, pore volume and average pore diameter of used ZnZSM-5- $\text{Al}_2\text{O}_3$ , IO-PtZnZSM-5- $\text{Al}_2\text{O}_3$  and IM-Pt/ZnZSM-5- $\text{Al}_2\text{O}_3$  hierarchical composite catalysts.

| Catalyst <sup>a</sup> | BET<br>SA <sup>b</sup><br>(m <sup>2</sup> /g) | Total<br>PV <sup>c</sup><br>(cm <sup>3</sup> /g) | Ave.<br>PD <sup>d</sup><br>(nm) | BJH<br>SA <sup>b</sup><br>(m <sup>2</sup> /g) | BJH<br>PV <sup>c</sup><br>(cm <sup>3</sup> /g) | BJH<br>PD <sup>d</sup><br>(nm) |
|-----------------------|-----------------------------------------------|--------------------------------------------------|---------------------------------|-----------------------------------------------|------------------------------------------------|--------------------------------|
| Zn(13)ZA              | 256                                           | 0.63                                             | 9.8                             | 271                                           | 0.63                                           | 11                             |
| IO1-PtZn(13)ZA        | 259                                           | 0.63                                             | 9.7                             | 258                                           | 0.62                                           | 11                             |
| IO2-PtZn(15)ZA        | 260                                           | 0.66                                             | 10                              | 269                                           | 0.66                                           | 11                             |
| IM1-Pt/Zn(15)ZA       | 260                                           | 0.63                                             | 9.7                             | 269                                           | 0.63                                           | 11                             |
| IM2-Pt/Zn(13)ZA       | 248                                           | 0.63                                             | 10                              | 271                                           | 0.64                                           | 11                             |
| IO3-PtZn(30)ZA        | 266                                           | 0.64                                             | 9.7                             | 278                                           | 0.64                                           | 11                             |
| IM3-Pt/Zn(30)ZA       | 259                                           | 0.62                                             | 9.6                             | 268                                           | 0.62                                           | 11                             |

<sup>a</sup> Abbreviation of the sample name is same as in the footnote of Figure 1. <sup>b</sup> SA: Surface area, <sup>c</sup> PV: Pore volume, <sup>d</sup> PD: Pore diameter

Table S2 Products Yield, iso/n ratio, RON, cetane number, aromatic yield of ZnZSM-5-Al<sub>2</sub>O<sub>3</sub>, IO-PtZnZSM-5-Al<sub>2</sub>O<sub>3</sub> and IM-Pt/ZnZSM-5-Al<sub>2</sub>O<sub>3</sub> hierarchical composite catalysts at 450°C

| Catalyst <sup>a</sup> | Conv. of MO (%) | iso-/n- (C5-) |      |      |      | RON (C5-C14) | Cetane Number (C15-C18) |
|-----------------------|-----------------|---------------|------|------|------|--------------|-------------------------|
|                       |                 |               | C2   | C3   | C4   |              |                         |
| Zn(13)ZA              | 100             | 1.8           | 1.3  | 3.5  | 5.3  | 77           | 75                      |
| IO1-PtZn(13)ZA        | 100             | 2.0           | 1.2  | 3.1  | 0.77 | 77           | 74                      |
| IO2-PtZn(15)ZA        | 100             | 2.0           | 1.1  | 2.8  | 0.87 | 83           | 74                      |
| IM1-Pt/Zn(15)ZA       | 100             | 1.9           | 0.14 | 0.24 | 0.93 | 86           | 75                      |
| IM2-Pt/Zn(13)ZA       | 100             | 3.0           | 0.05 | 0.03 | 0.32 | 101          | 73                      |
| IO3-PtZn(30)ZA        | 100             | 2.6           | 0.6  | 2.0  | 5.6  | 90           | 74                      |
| IM3-Pt/Zn(30)ZA       | 100             | 1.6           | 0.25 | 2.2  | 3.5  | 95           | 75                      |

  

| Selectivity of Product (wt%) |                   |                    |                  |      |                     | Aromatic yield (wt%) | MB <sup>b</sup> (%) |
|------------------------------|-------------------|--------------------|------------------|------|---------------------|----------------------|---------------------|
| Gas (C1-C4)                  | Gasoline (C5-C11) | Kerosene (C12-C14) | Diesel (C15-C18) | C19- | CO, CO <sub>2</sub> |                      |                     |
| 8.4                          | 47                | 9.8                | 15               | 15   | 4.4(3.5)            | 13                   | 94                  |
| 7.6                          | 41                | 5.8                | 14               | 28   | 3.7(2.9)            | 9.7                  | 96                  |
| 11                           | 43                | 4.4                | 19               | 18   | 4.7(1.8)            | 13                   | 92                  |
| 37                           | 27                | 2.1                | 20               | 3.0  | 9.5(0.78)           | 12                   | 99                  |
| 74                           | 10                | 0.37               | 1.4              | 0.49 | 13(3.1)             | 8.4                  | 97                  |
| 26                           | 42                | 2.6                | 16               | 10   | 3.8(1.4)            | 16                   | 98                  |
| 61                           | 15                | 0.57               | 9.6              | 1.4  | 13(0.86)            | 11                   | 95                  |

<sup>a</sup>Abbreviation of the sample name is same as in the footnote of Figure 1. <sup>b</sup>The material balance (MB) in Table S2 is given as wt% of the sum of recovered liquid and gas products against feed. Water is included in the liquid product.

Table S3 Products Yield, iso/n ratio, RON, cetane number, aromatic yield of ZnZSM-5-Al<sub>2</sub>O<sub>3</sub>, IO-PtZnZSM-5-Al<sub>2</sub>O<sub>3</sub> and IM-Pt/ZnZSM-5-Al<sub>2</sub>O<sub>3</sub> hierarchical composite catalysts at 550°C

| Catalyst <sup>a</sup> | Conv. of MO (%) | iso-/n- (C5-) | C2 C3 C4 |     |      | RON (C5-C14) | Cetane Number (C15-C18) |
|-----------------------|-----------------|---------------|----------|-----|------|--------------|-------------------------|
|                       |                 |               |          |     |      |              |                         |
| Zn(13)ZA              | 100             | 1.2           | 1.3      | 6.5 | 0.39 | 83           | 72                      |
| IO1-PtZn(13)ZA        | 100             | 2.2           | 1.3      | 1.9 | 7.0  | 76           | 72                      |
| IO2-PtZn(15)ZA        | 100             | 2.0           | 1.1      | 2.8 | 0.87 | 83           | 74                      |
| IM1-Pt/Zn(15)ZA       | 100             | 1.3           | 0.37     | 1.0 | 2.5  | 86           | 72                      |
| IM2-Pt/Zn(13)ZA       | 100             | 1.4           | 0.43     | 1.0 | 2.1  | 93           | 74                      |
| IO3-PtZn(30)ZA        | 100             | 1.4           | 0.6      | 1.7 | 7.7  | 81           | 72                      |
| IM3-Pt/Zn(30)ZA       | 100             | 1.0           | 0.43     | 1.3 | 4.9  | 85           | 72                      |

  

| Selectivity of Product (wt.%) |                   |                    |                  |      |                     | Aromatic yield (wt. %) | MB <sup>b</sup> (%) |
|-------------------------------|-------------------|--------------------|------------------|------|---------------------|------------------------|---------------------|
| Gas (C1-C4)                   | Gasoline (C5-C11) | Kerosene (C12-C14) | Diesel (C15-C18) | C19- | CO, CO <sub>2</sub> |                        |                     |
| 36                            | 45                | 3.1                | 7.1              | 2.0  | 6.8(4.8)            | 17                     | 98                  |
| 33                            | 43                | 5.7                | 7.3              | 3.0  | 7.1(5.1)            | 12                     | 90                  |
| 41                            | 38                | 4.2                | 6.0              | 3.5  | 6.8(4.3)            | 16                     | 96                  |
| 44                            | 36                | 3.9                | 6.4              | 2.2  | 6.8(3.8)            | 19                     | 97                  |
| 60                            | 22                | 1.7                | 4.6              | 2.7  | 9.4(3.9)            | 15                     | 94                  |
| 47                            | 34                | 3.7                | 5.9              | 2.6  | 6.9(4.2)            | 17                     | 93                  |
| 50                            | 33                | 3.0                | 5.1              | 1.7  | 7.6(3.7)            | 17                     | 98                  |

<sup>a</sup>Abbreviation of the sample name is same as in the footnote of Figure 1. <sup>b</sup>The material balance (MB) in Table S3 is given as wt% of the sum of recovered liquid products against feed. Water is included in the liquid product.

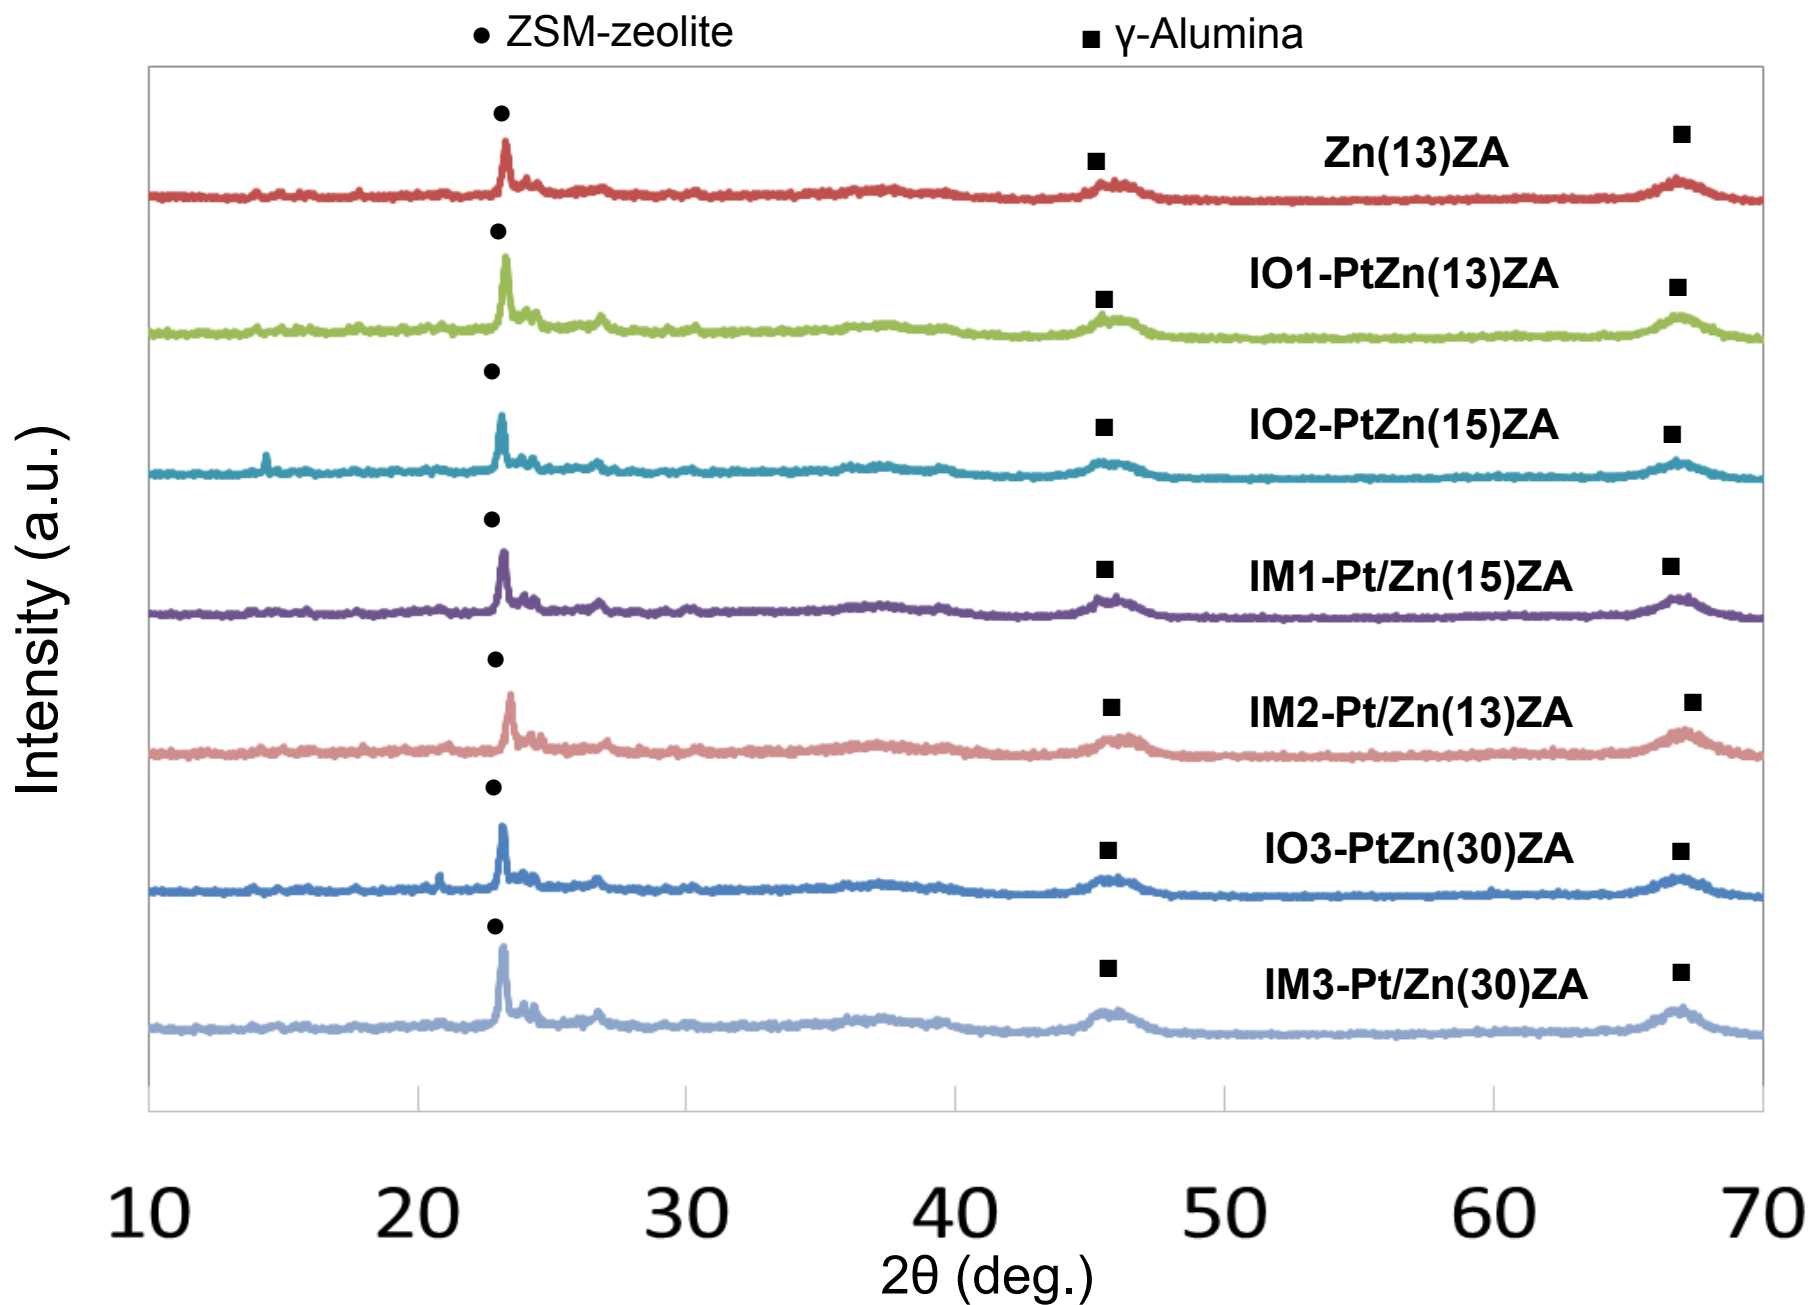

Figure S1 XRD patterns of used Pt/ZnZSM-5- $\text{Al}_2\text{O}_3$  and ZnZSM-5- $\text{Al}_2\text{O}_3$  hierarchical composite catalysts. Abbreviation of the sample name is same as in the footnote of Figure 1.

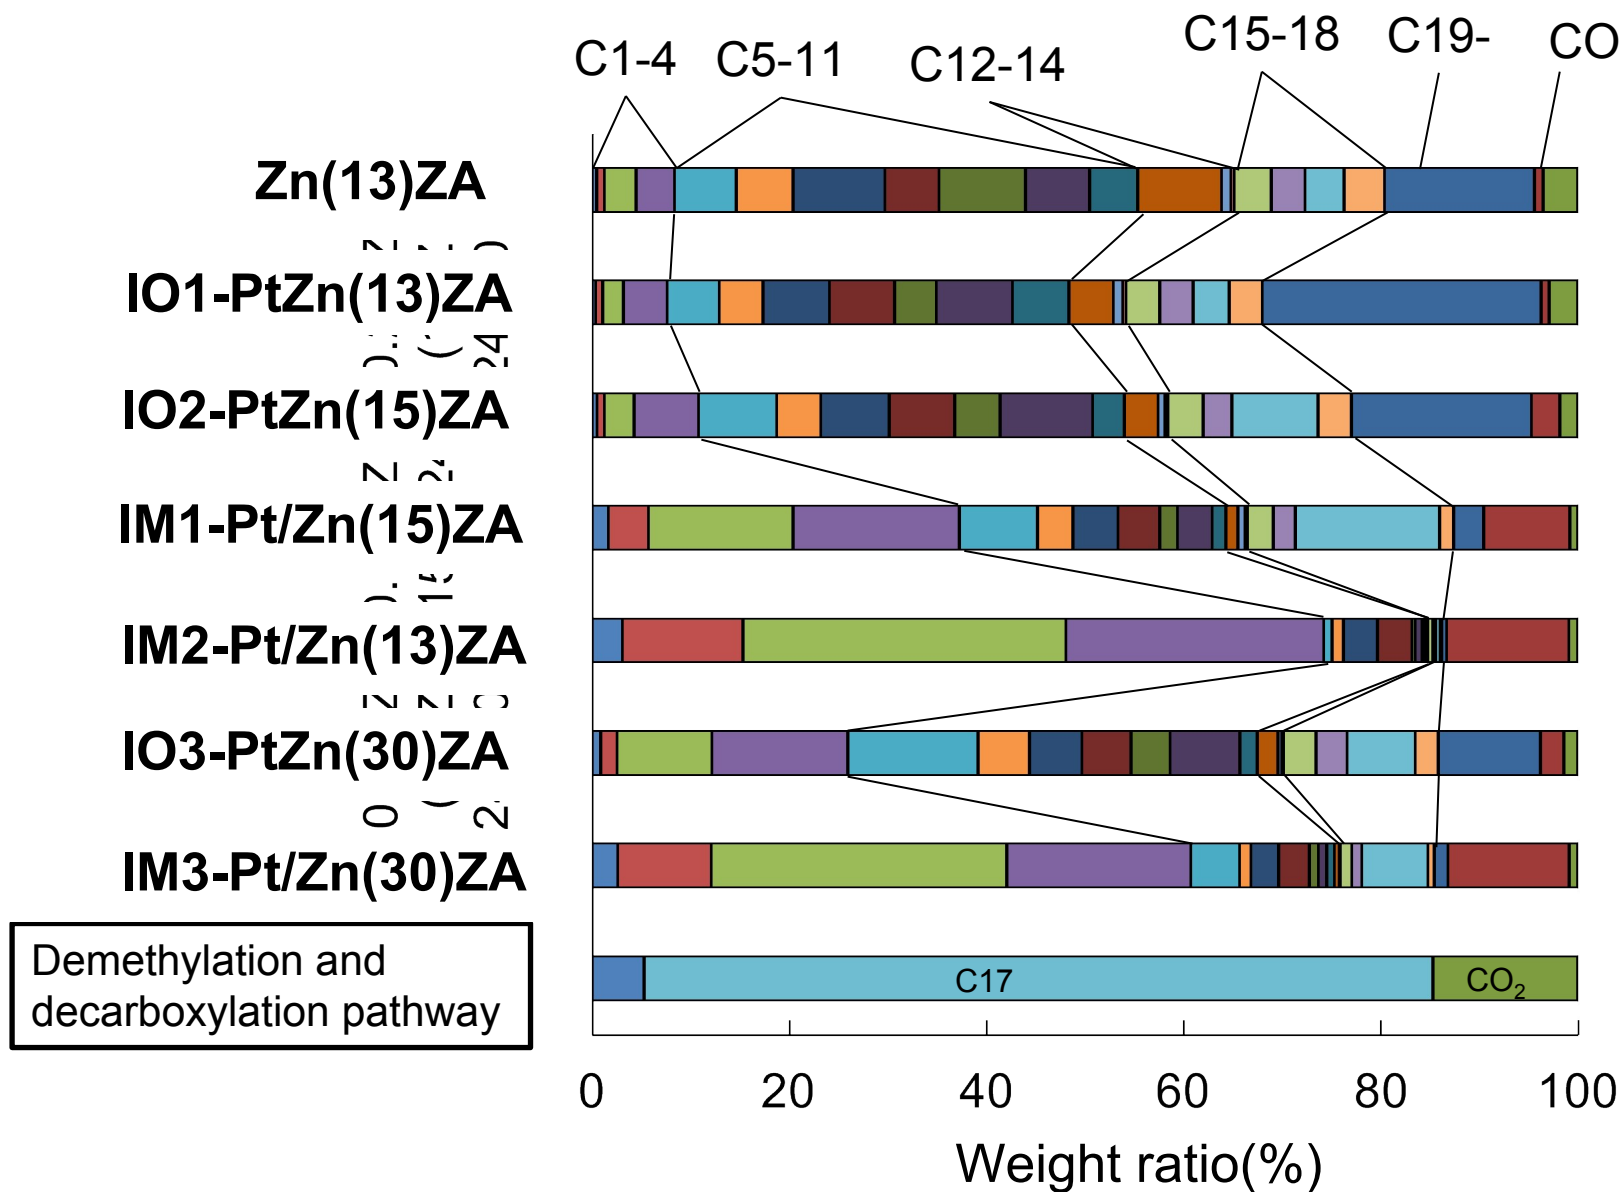

Figure S2 Carbon number distribution of products in dehydrocyclization-cracking of methyl oleate at 450°C.

Abbreviation of the sample name is same as in the footnote of Figure 1.

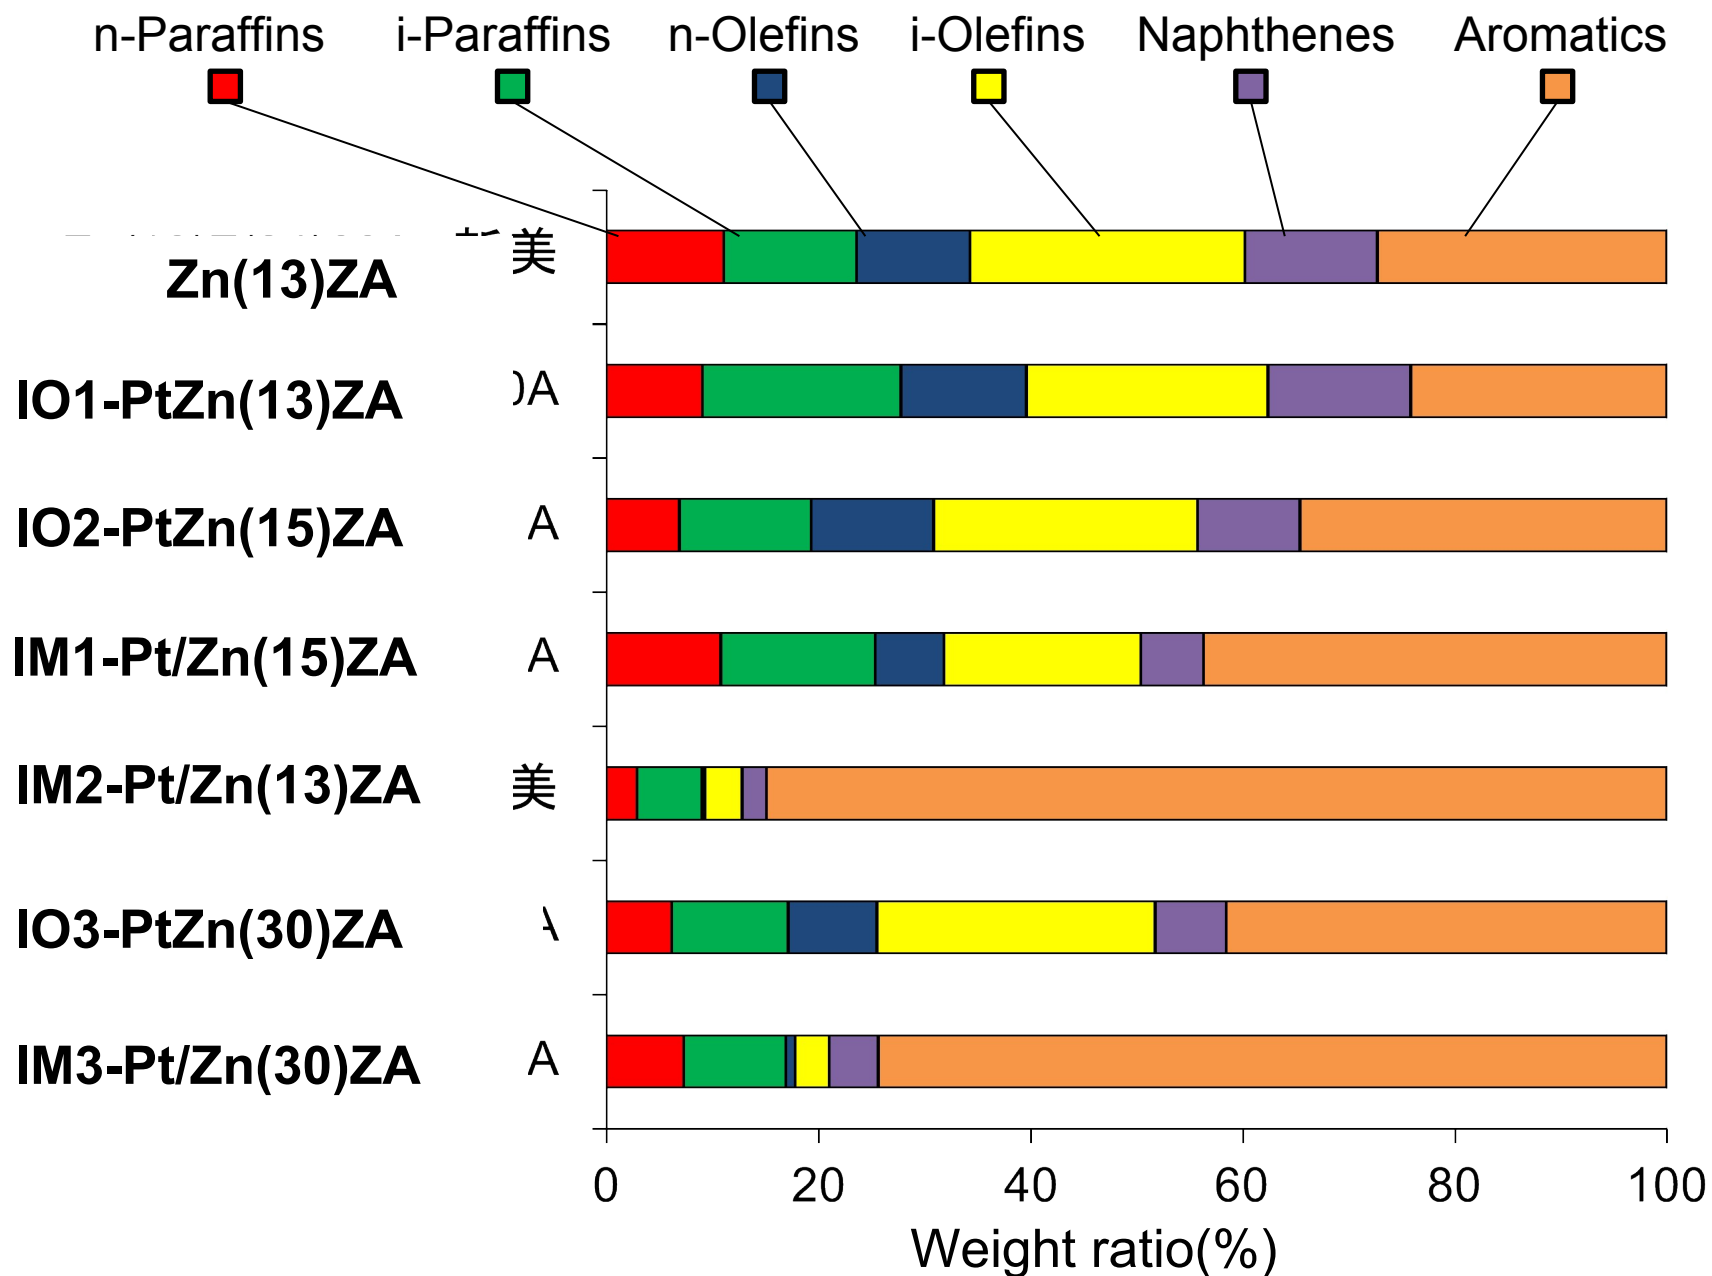

Figure S3 PONA distribution of products in dehydrocyclization-cracking of methyl oleate at 450°C (C5-C14)

Abbreviation of the sample name is same as in the footnote of Figure 1.

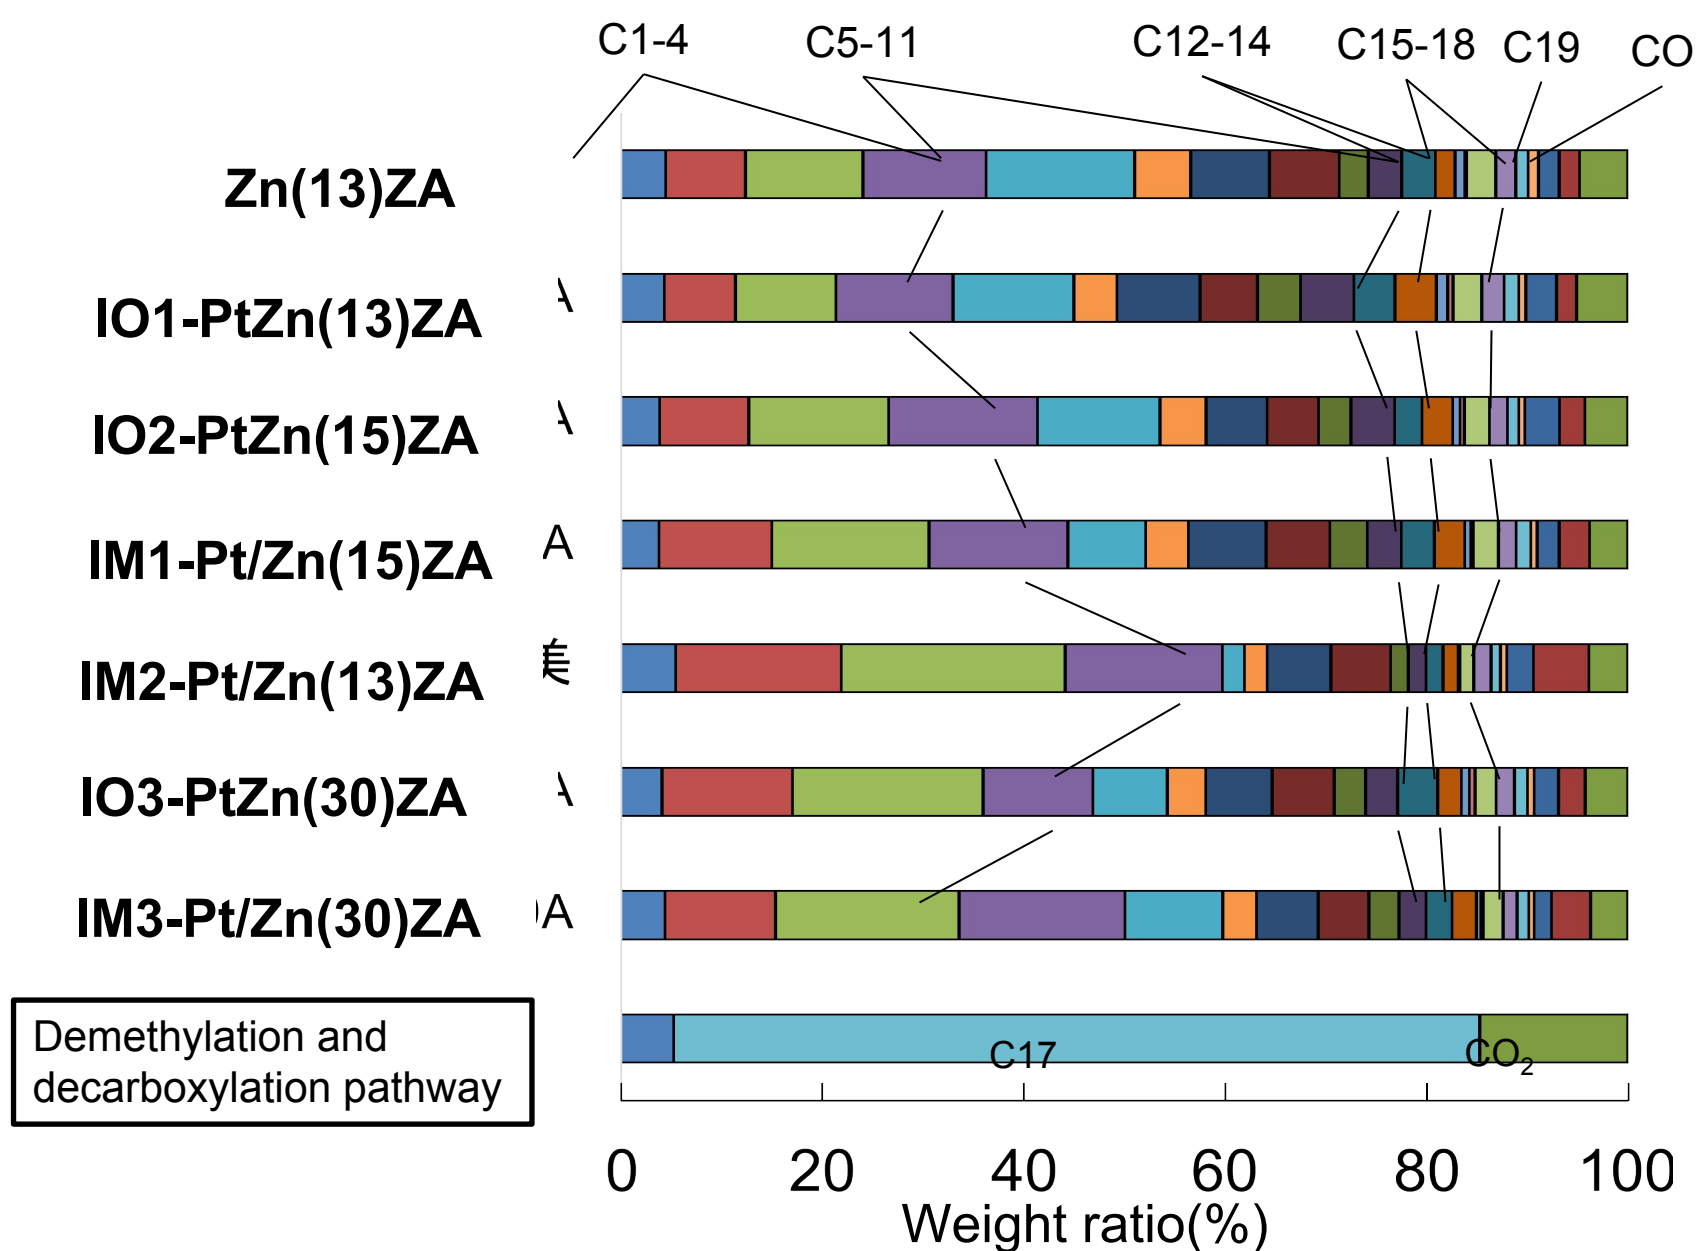

Figure S4 Carbon number distribution of products in dehydrocyclization-cracking at 550°C

Abbreviation of the sample name is same as in the footnote of Figure 1.

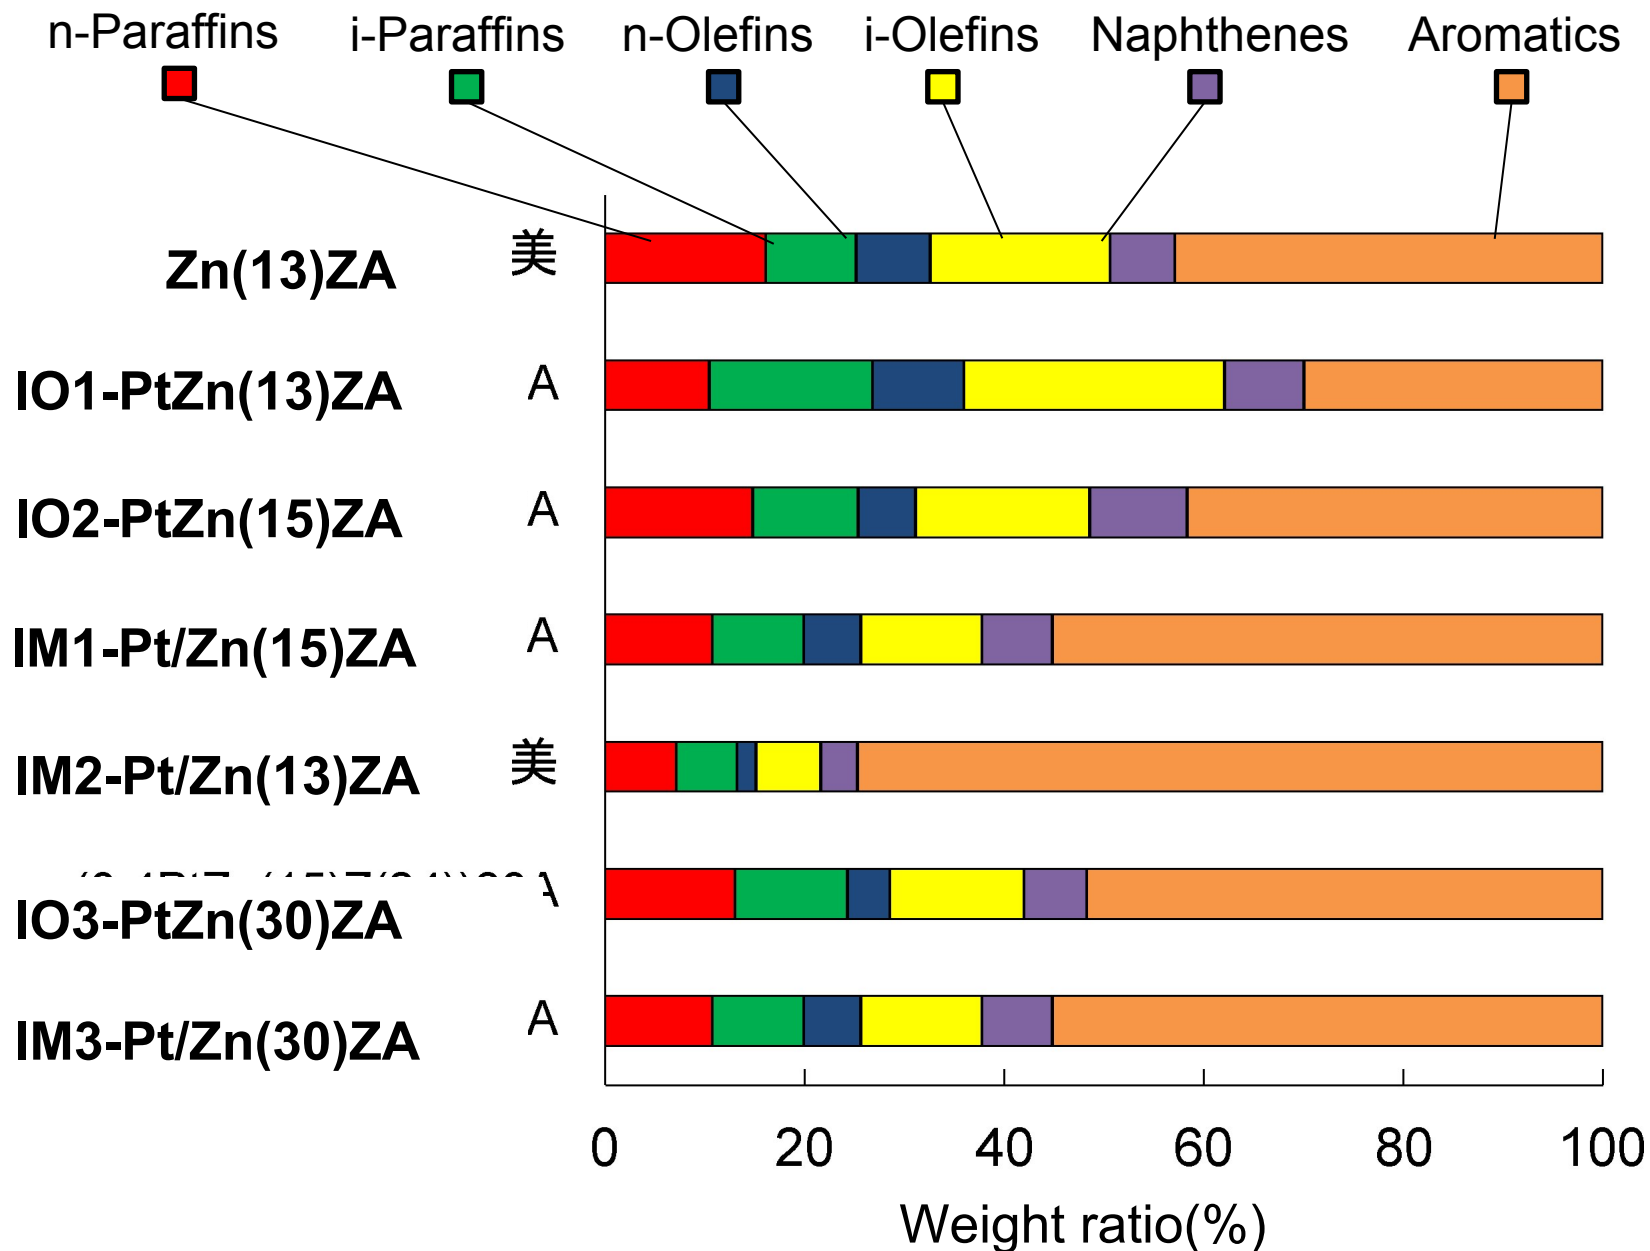

Figure S5 PONA distribution of products in dehydrocyclization-cracking of methyl oleate at 550°C (C5-C14)

Abbreviation of the sample name is same as in the footnote of Figure 1.
